# Supplementary material for: The Antimicrobial and Cytotoxicity Properties of New Dibrominated 1,3-Dithiolium Flavonoids
Source: MDPI journal article supplement (doi:10.3390/ph19020259), 2026-02-02

# **The antimicrobial and cytotoxicity properties of new dibrominated 1,3-dithiolium flavonoids**

**Laura Gabriela Sarbu , Ana Alexandru Dumitru, Mihaela Savu, Isabela Andreea Sandu, Lucian Gabriel Bahrin, Marius Stefan and Mihail Lucian Birsa**

## **Supplementary Material**

|                                                            |                |
|------------------------------------------------------------|----------------|
| <b>1. Elemental analysis</b>                               | <b>S2</b>      |
| <b>2. Copies of <math>^{13}\text{C}</math> NMR spectra</b> | <b>S3-S10</b>  |
| <b>3. Copies of <math>^1\text{H}</math> NMR spectra</b>    | <b>S11-S14</b> |

## 1. Elemental analysis

Elemental analyses (C, H) were conducted using a CE440 Elemental Analyser; the results were found to be in good agreement ( $\pm 0.3\%$ ) with the calculated values.

**Table S1.** Elemental analysis data for the newly synthesized flavanones **4a-d** and tricyclic flavonoids **5a-d**.

| Compound  | % C    |       | % H    |       |
|-----------|--------|-------|--------|-------|
|           | calcd. | found | calcd. | found |
| <b>4a</b> | 45.38  | 45.58 | 3.62   | 3.39  |
| <b>4b</b> | 46.42  | 46.62 | 3.90   | 2.98  |
| <b>4c</b> | 47.41  | 47.69 | 4.16   | 3.99  |
| <b>4d</b> | 45.09  | 45.27 | 3.78   | 3.59  |
| <b>5a</b> | 40.10  | 40.21 | 3.03   | 3.24  |
| <b>5b</b> | 41.14  | 41.31 | 3.29   | 2.99  |
| <b>5c</b> | 42.13  | 42.39 | 3.54   | 3.29  |
| <b>5d</b> | 40.09  | 40.21 | 3.20   | 3.02  |

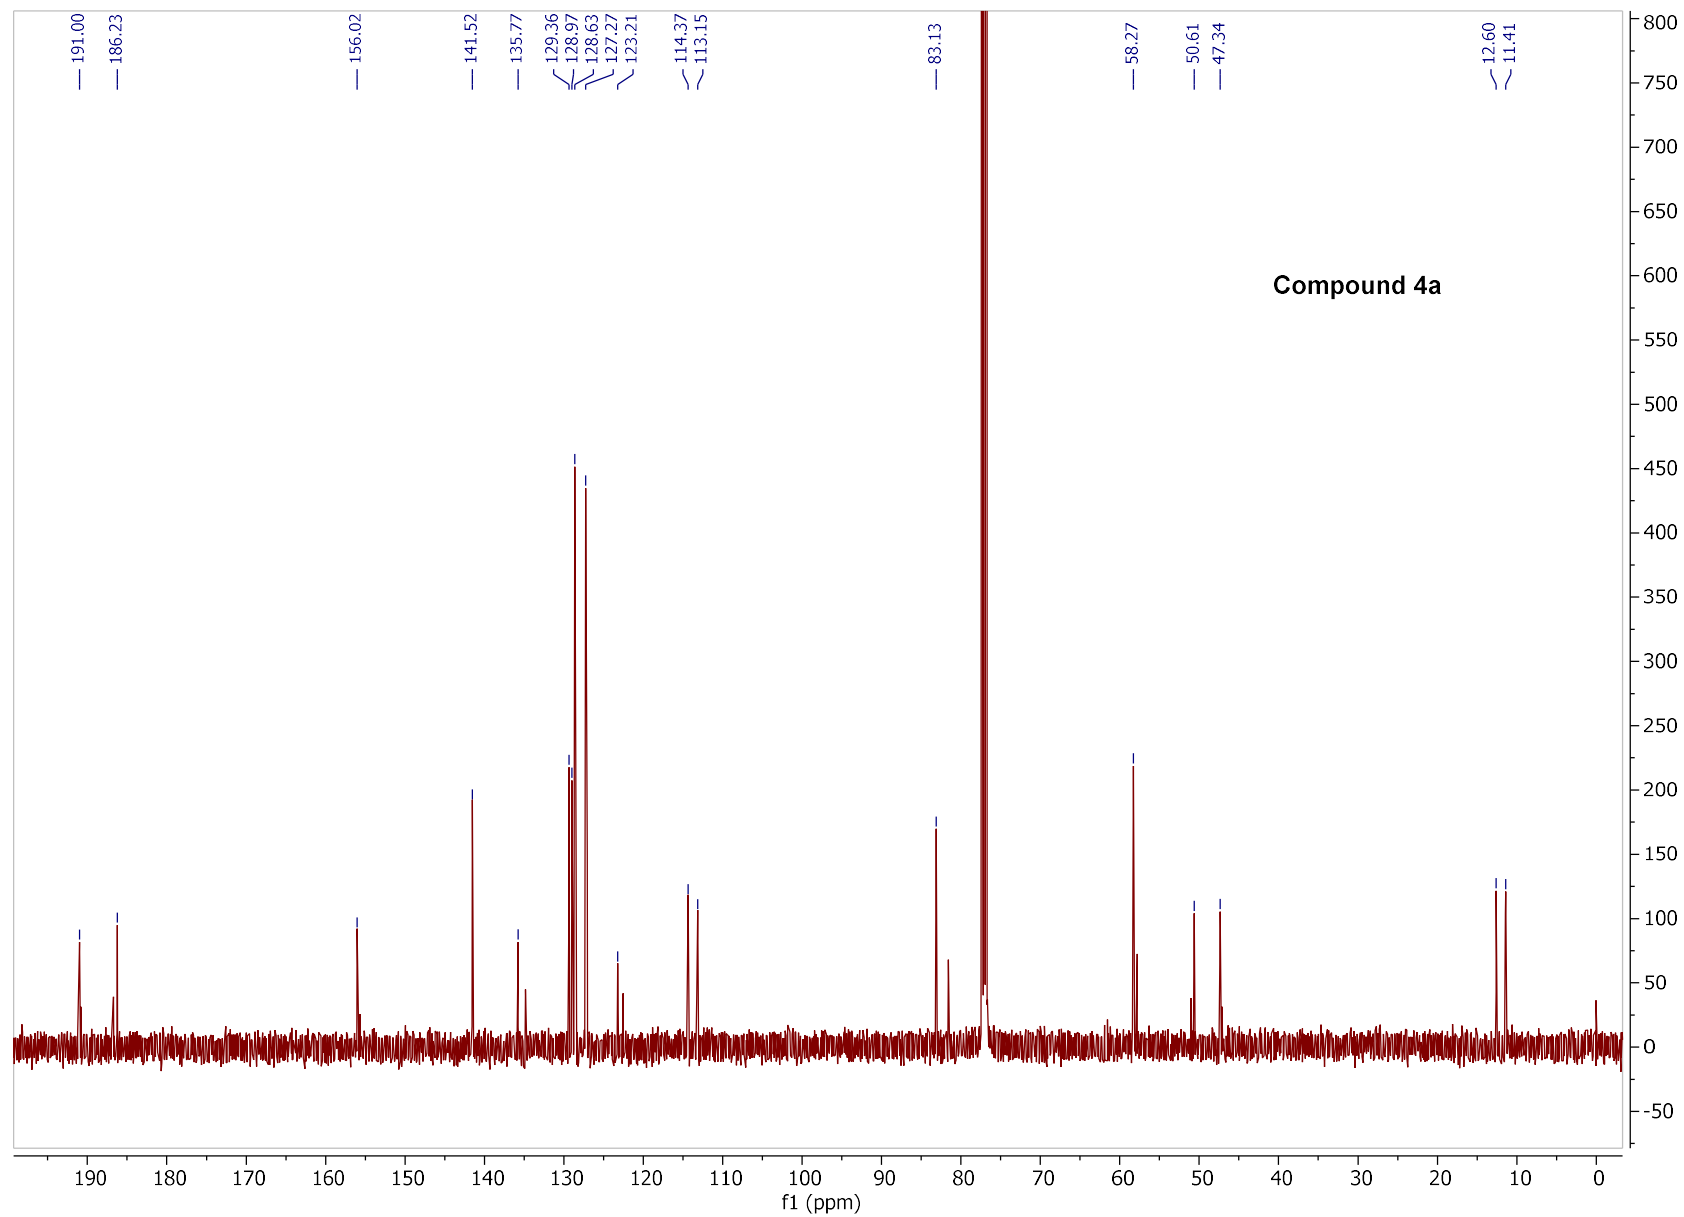

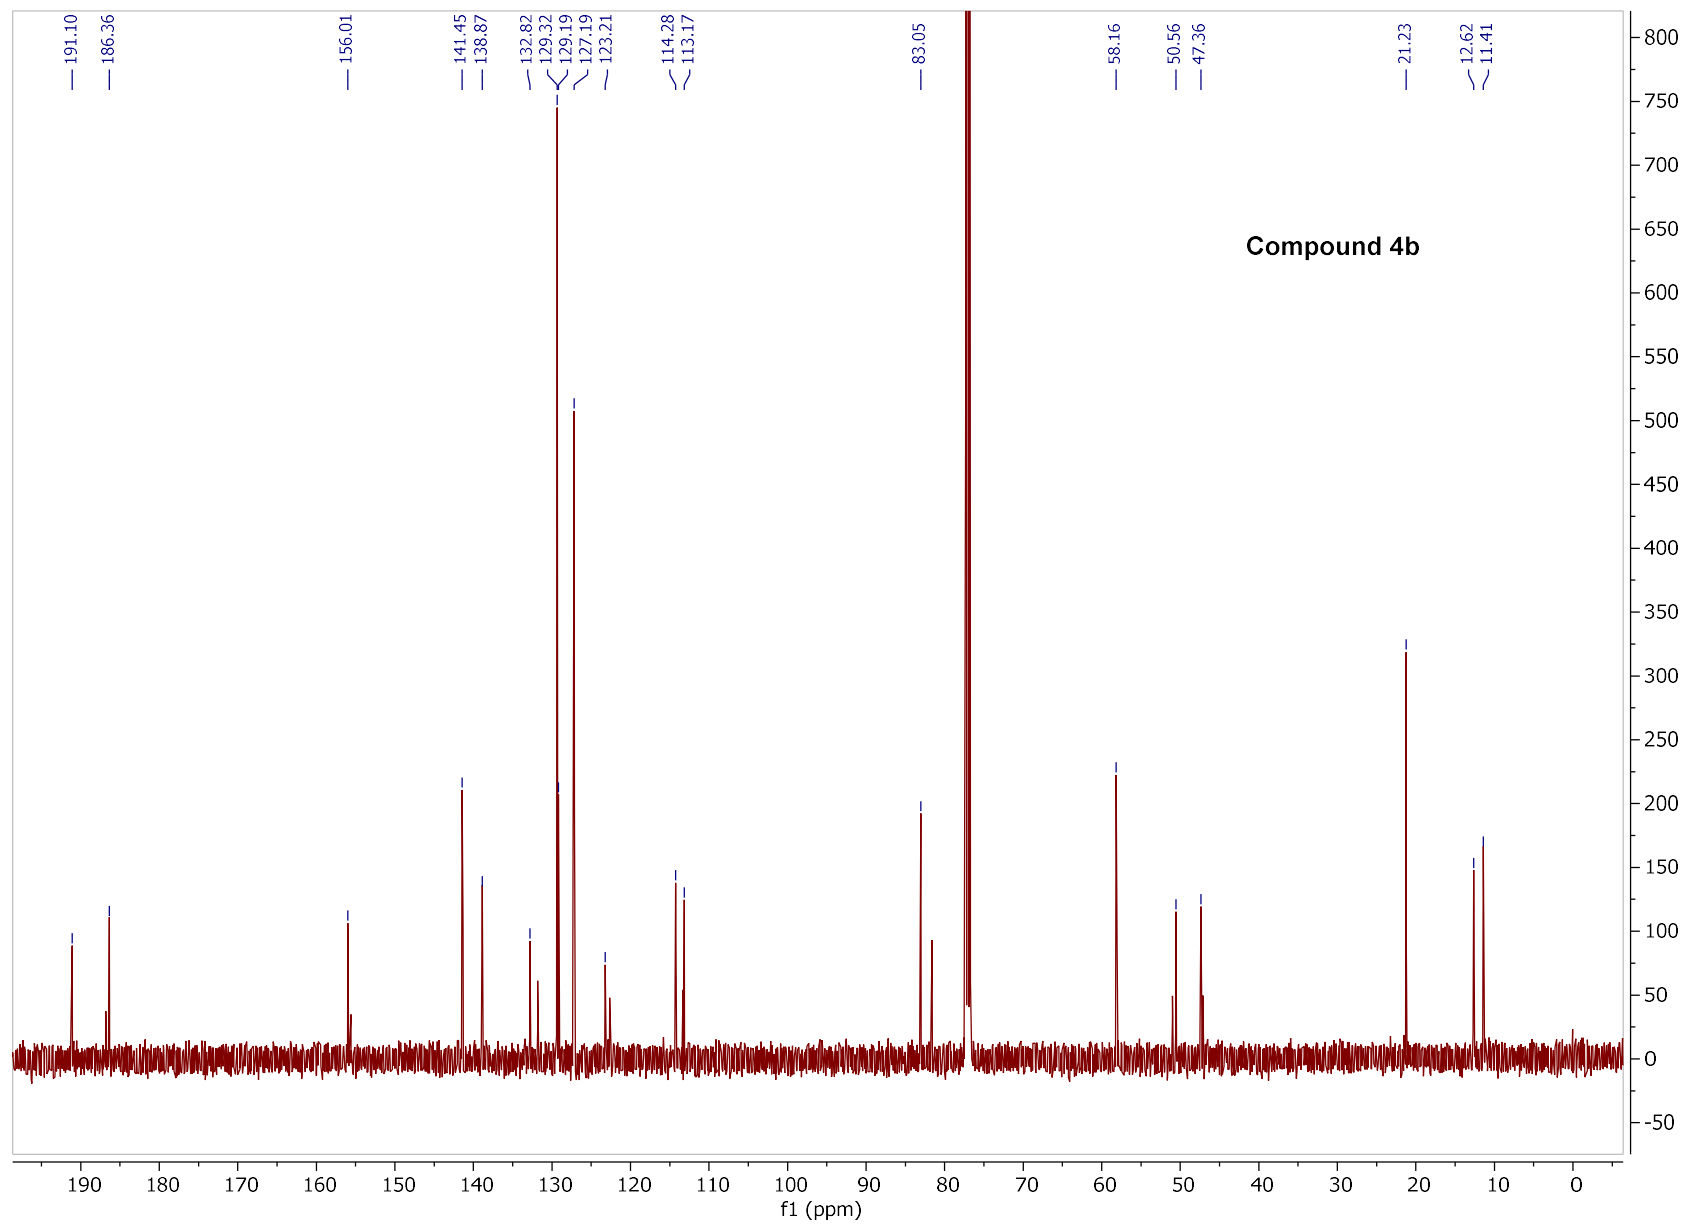

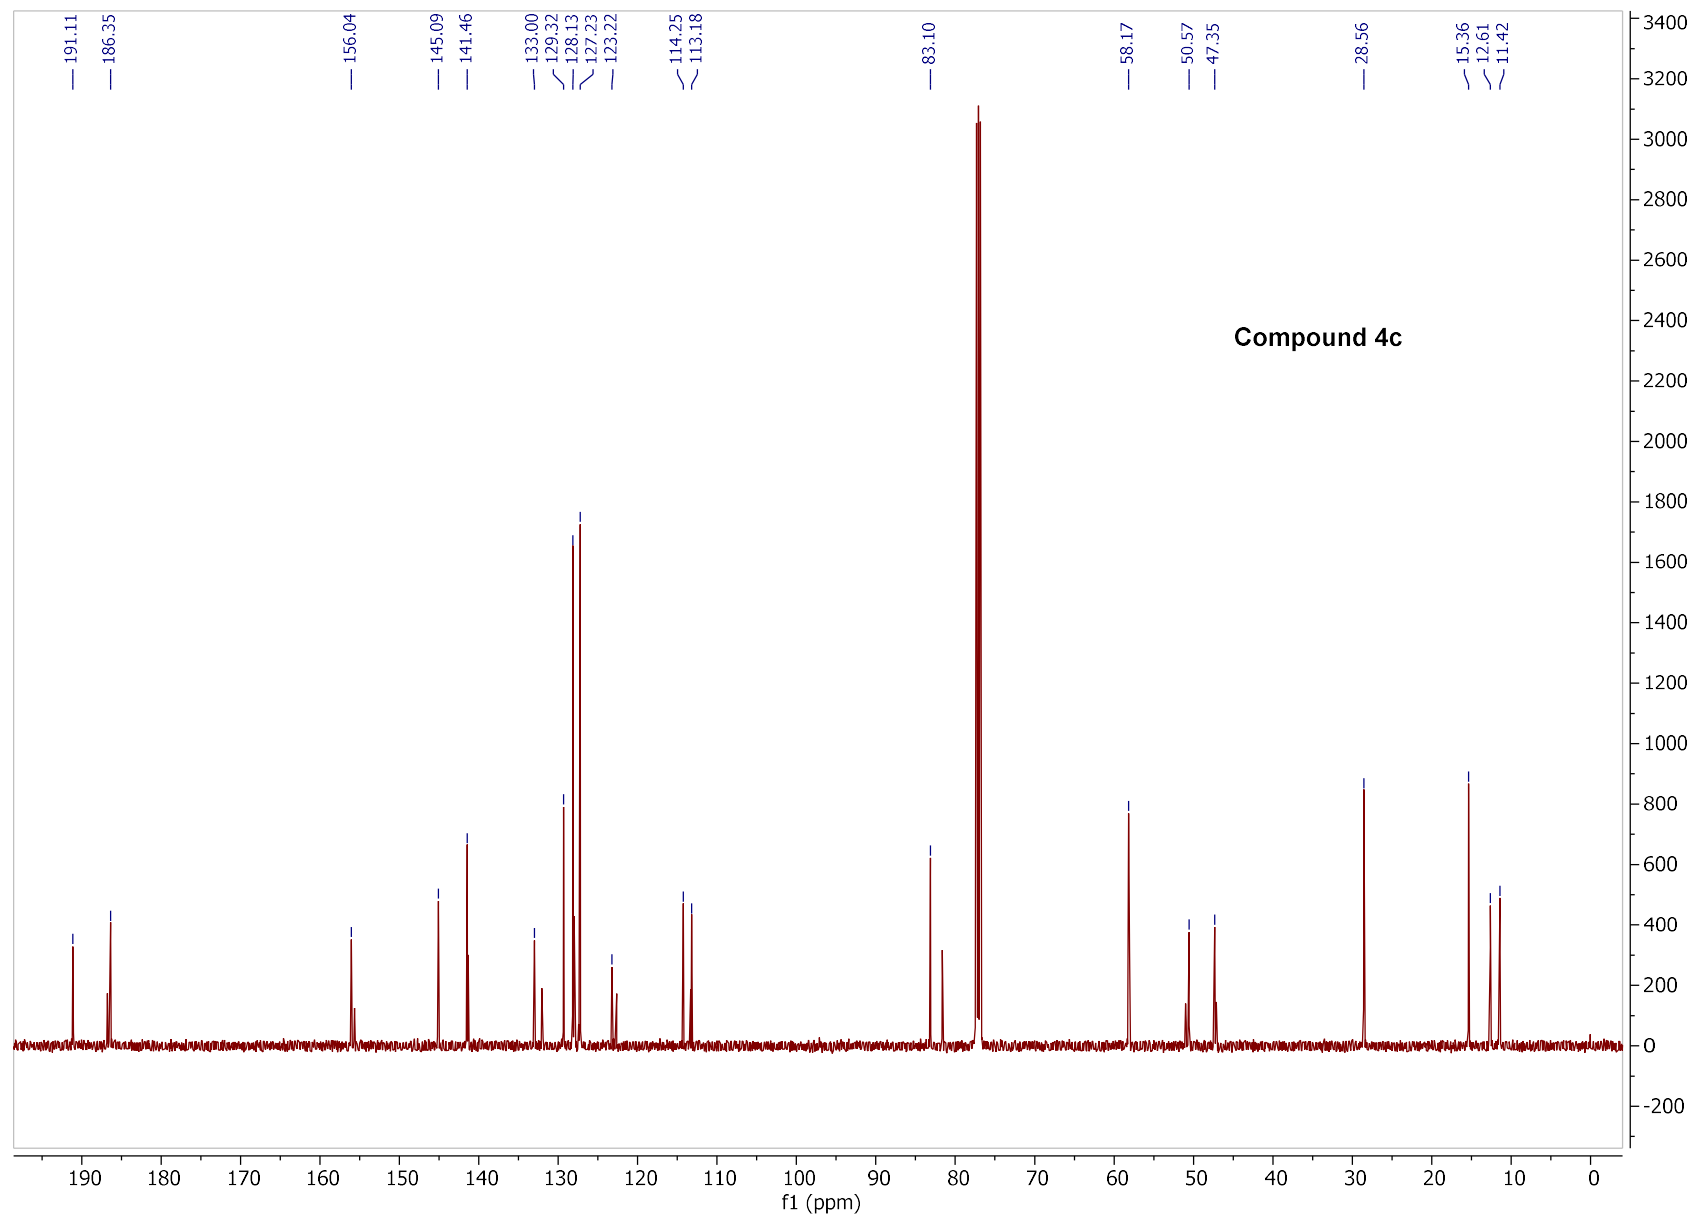

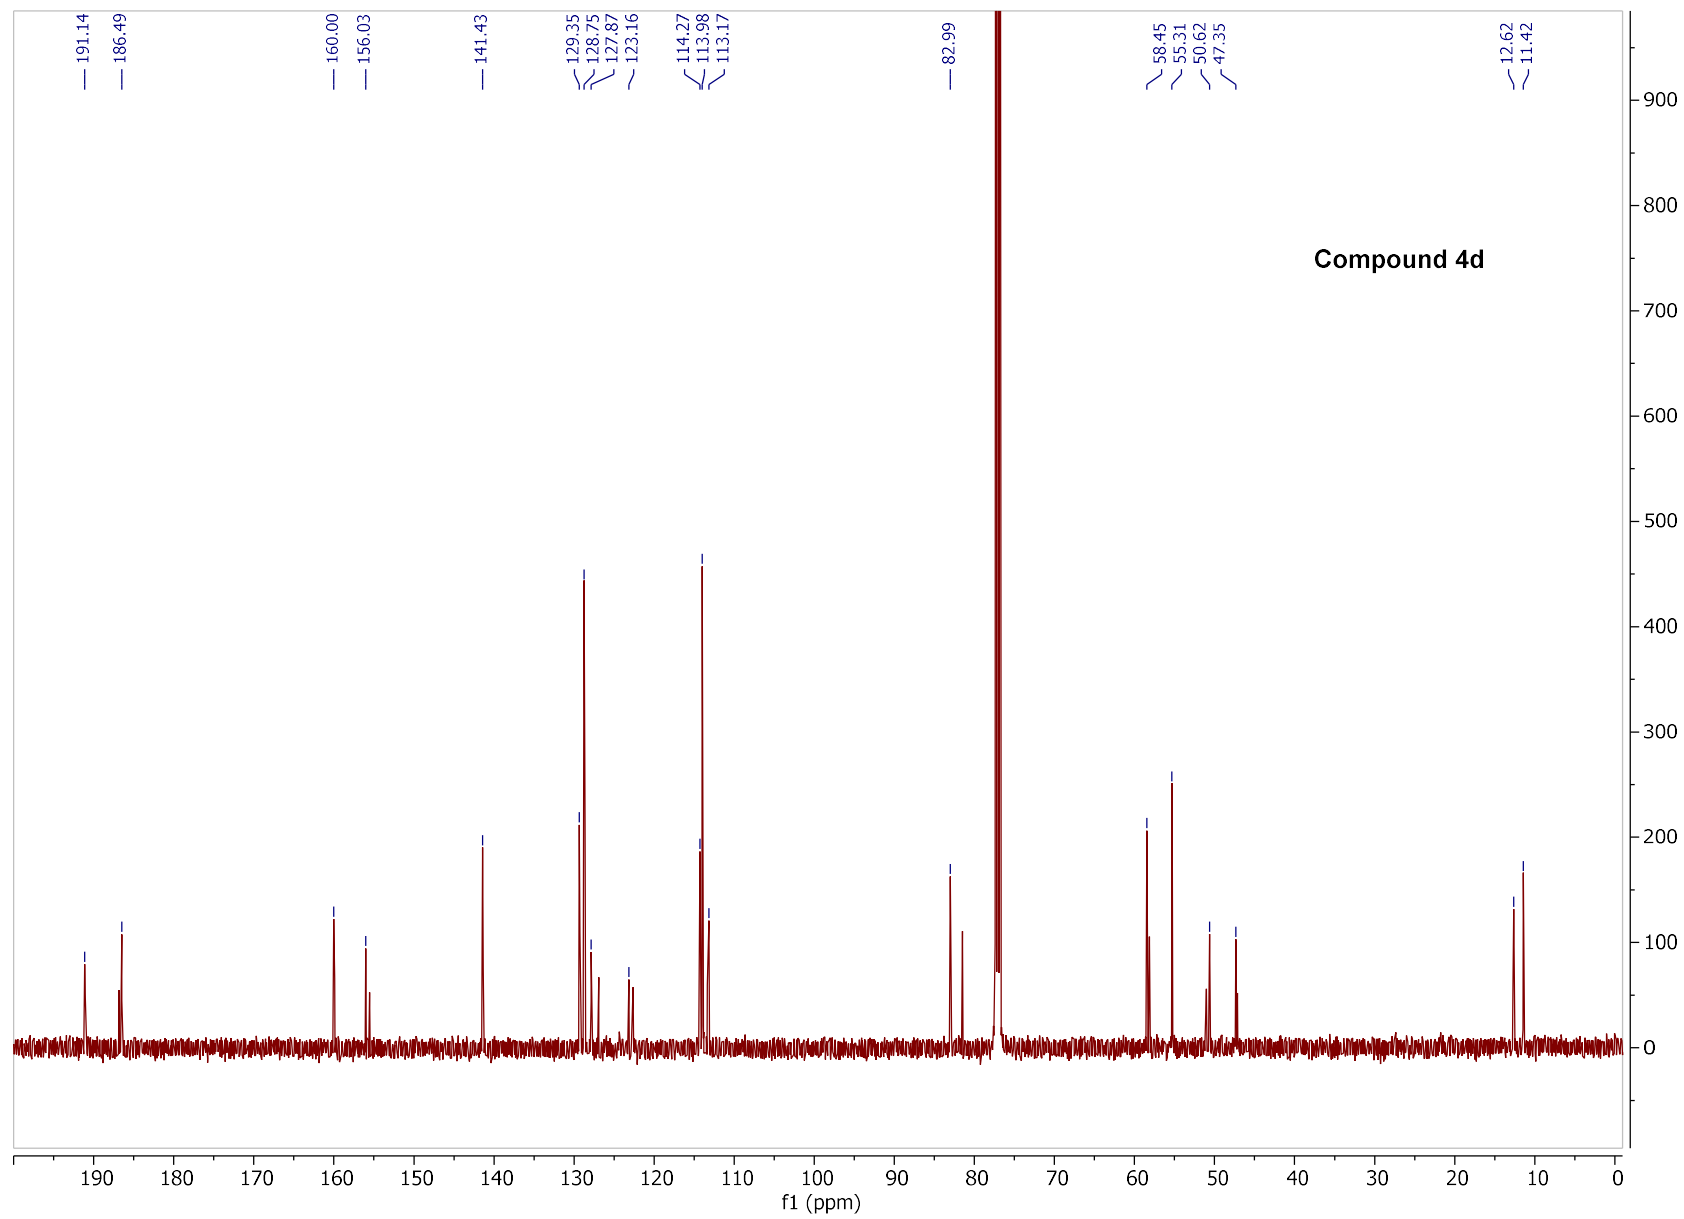

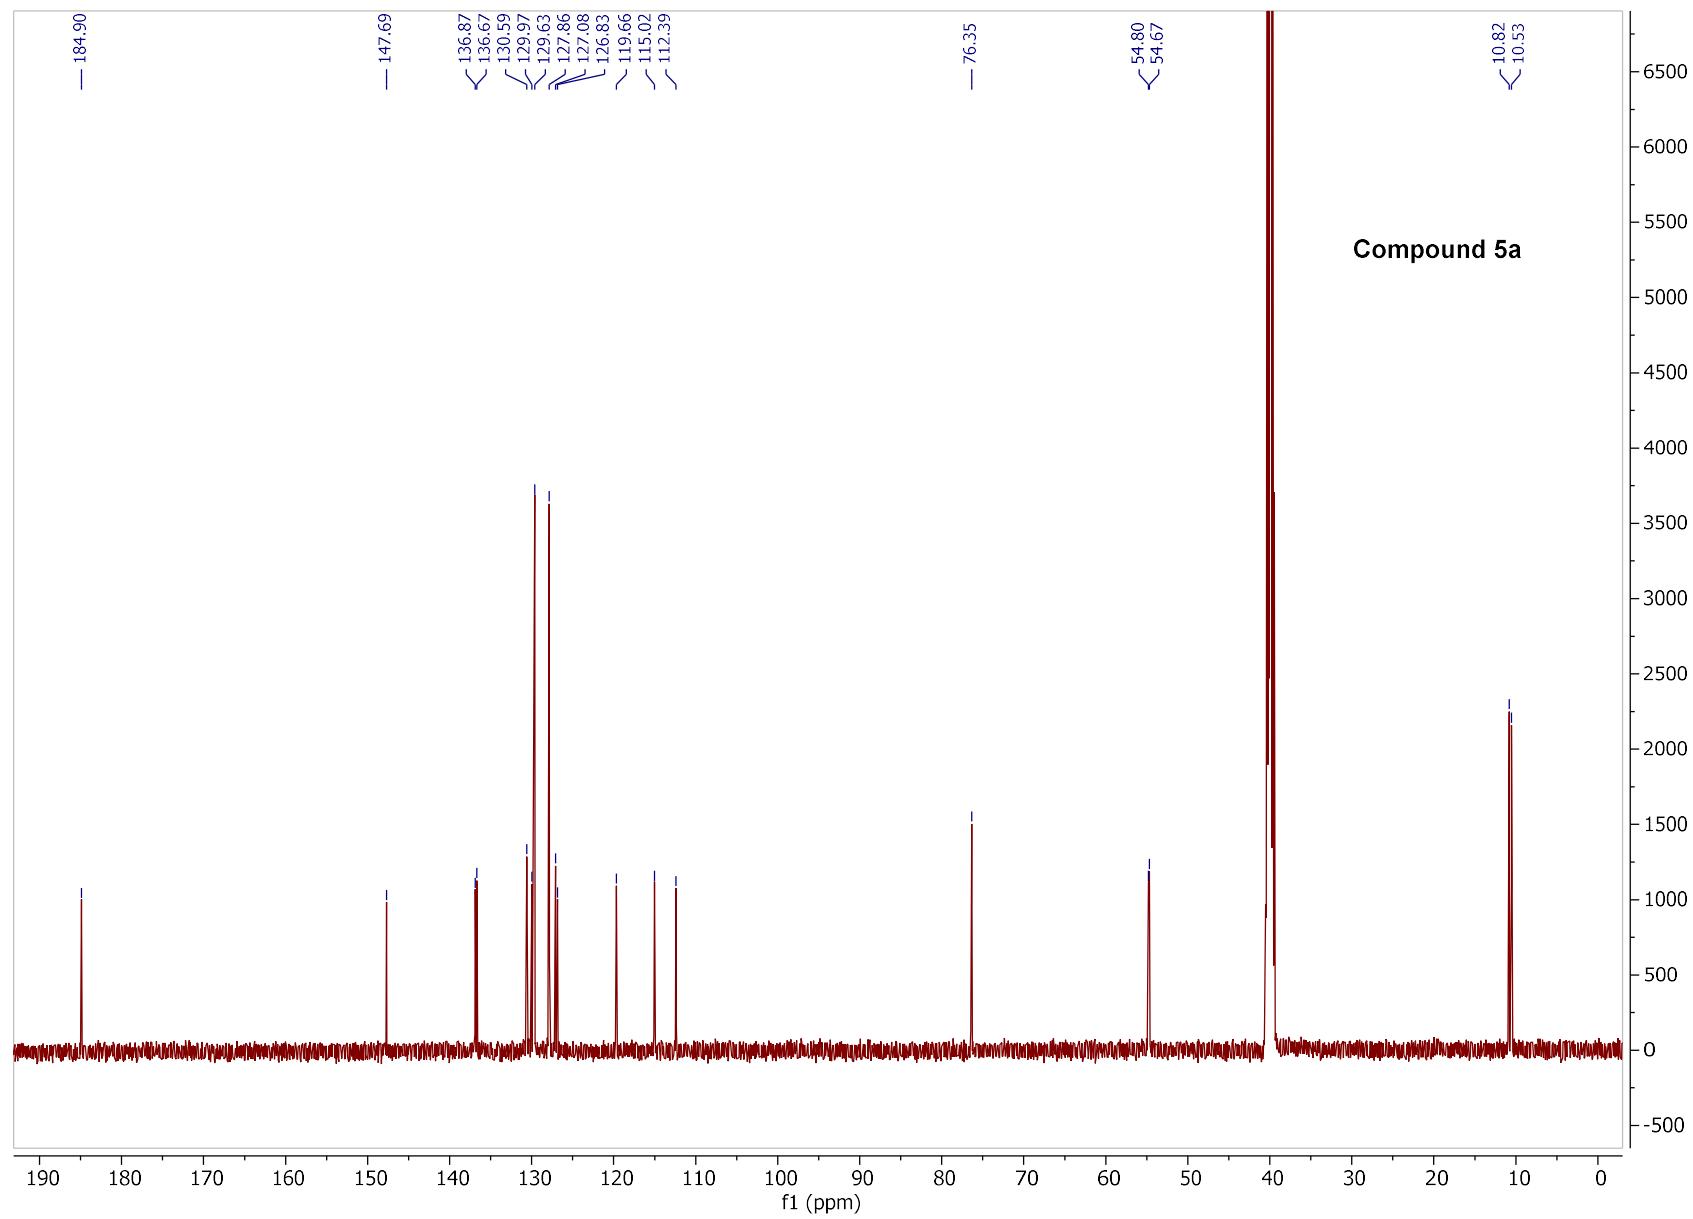

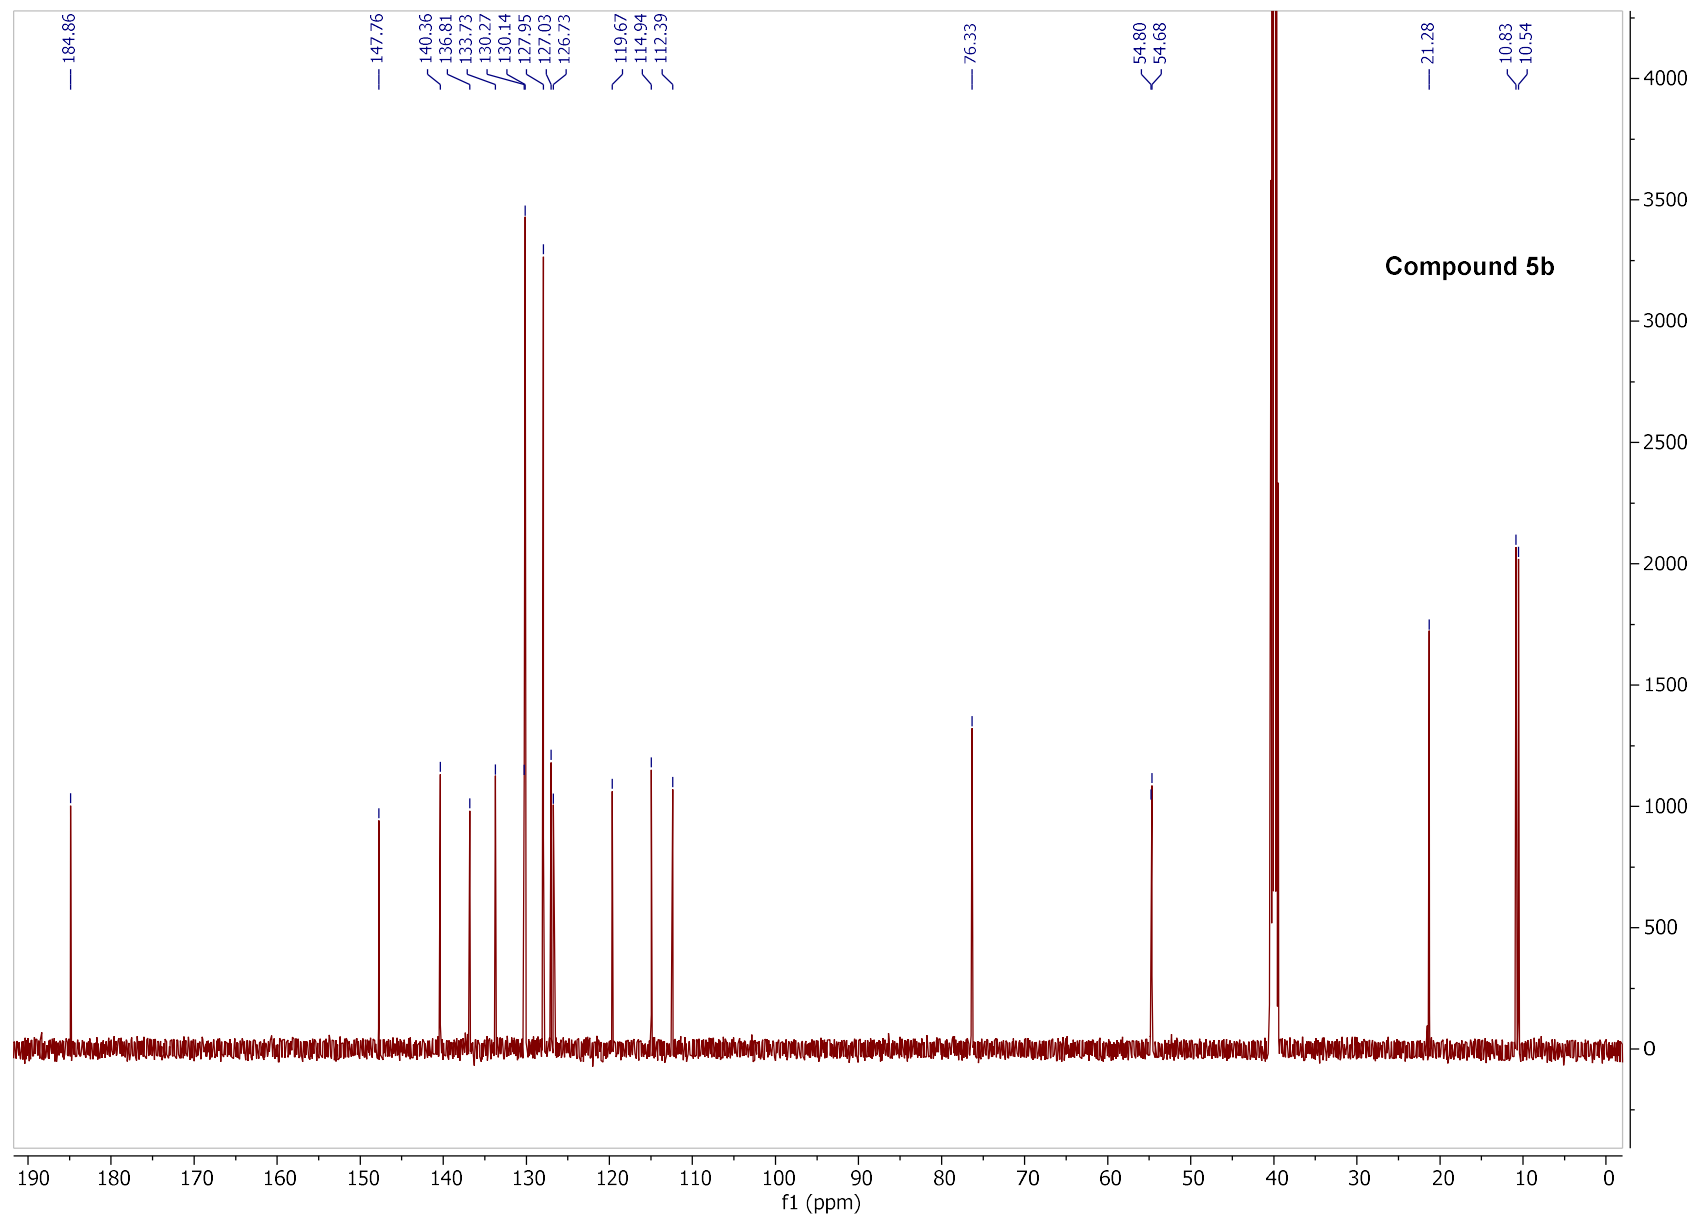



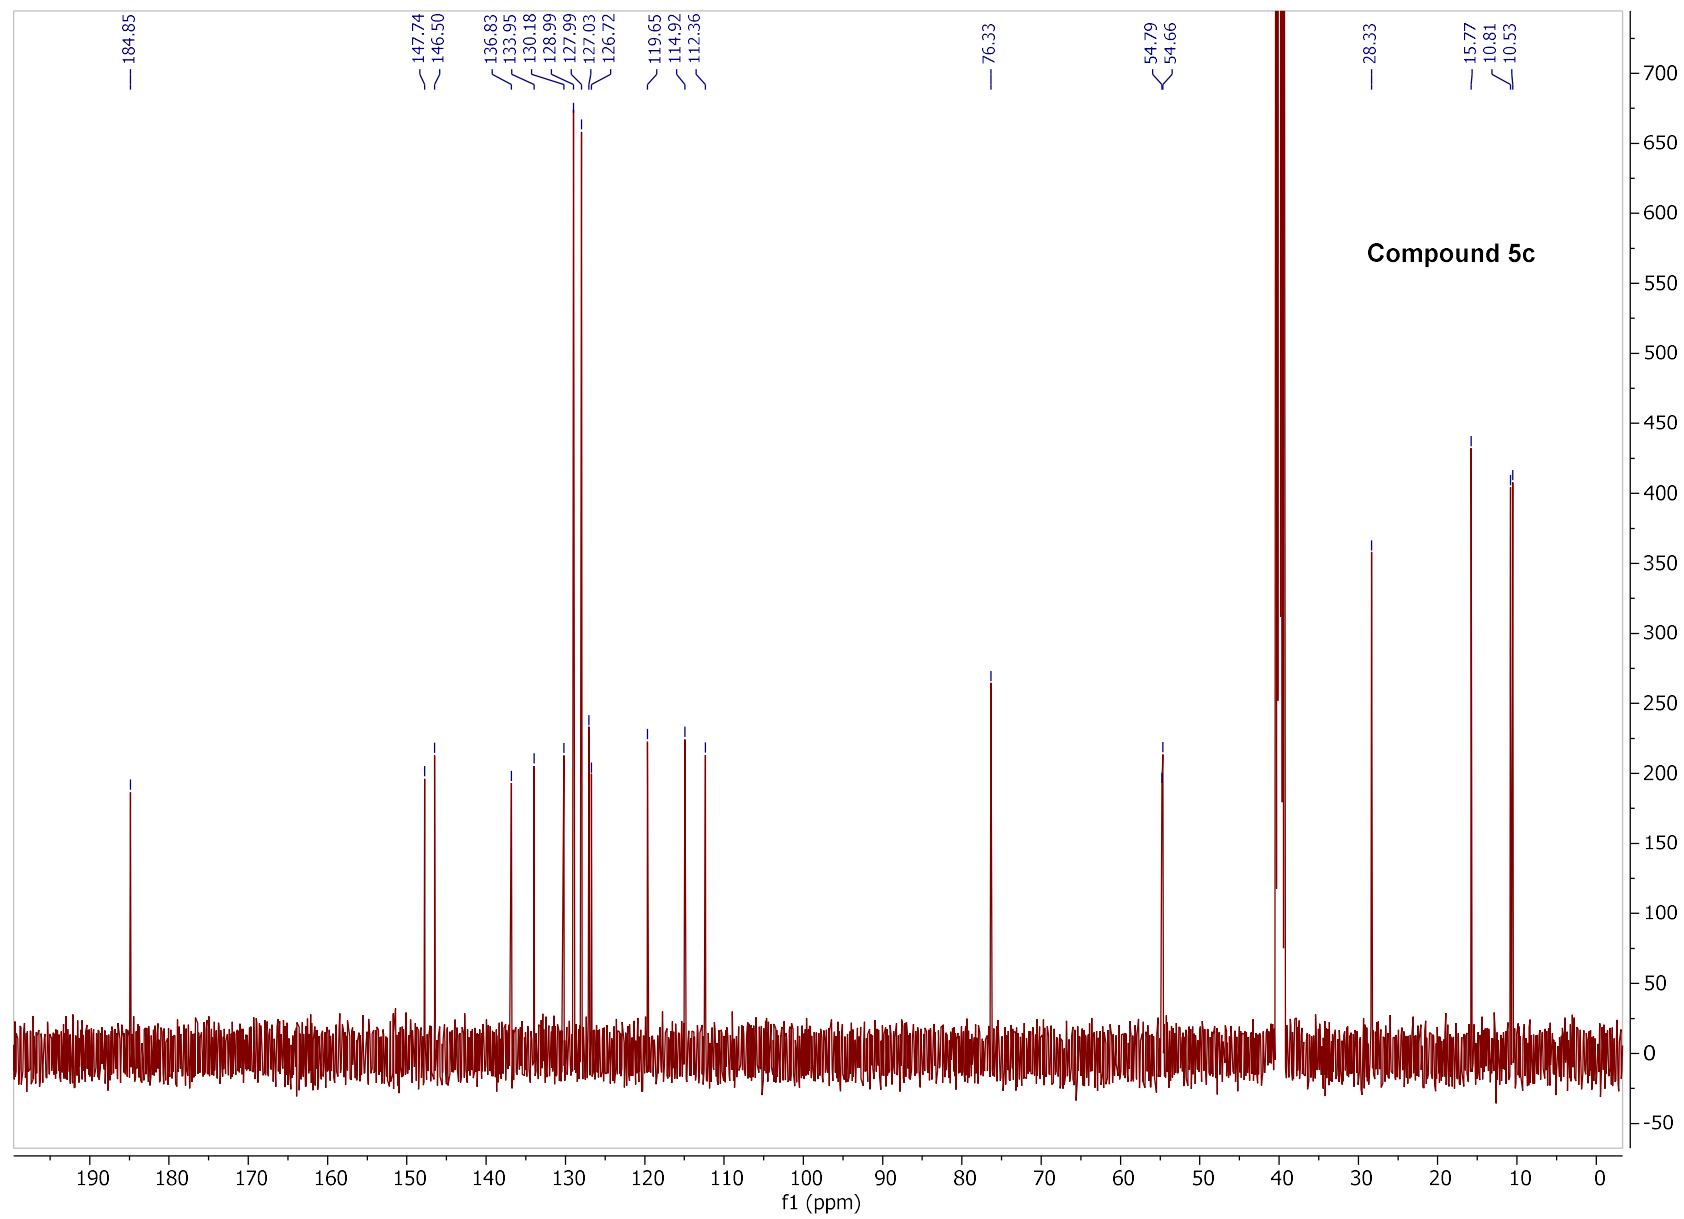

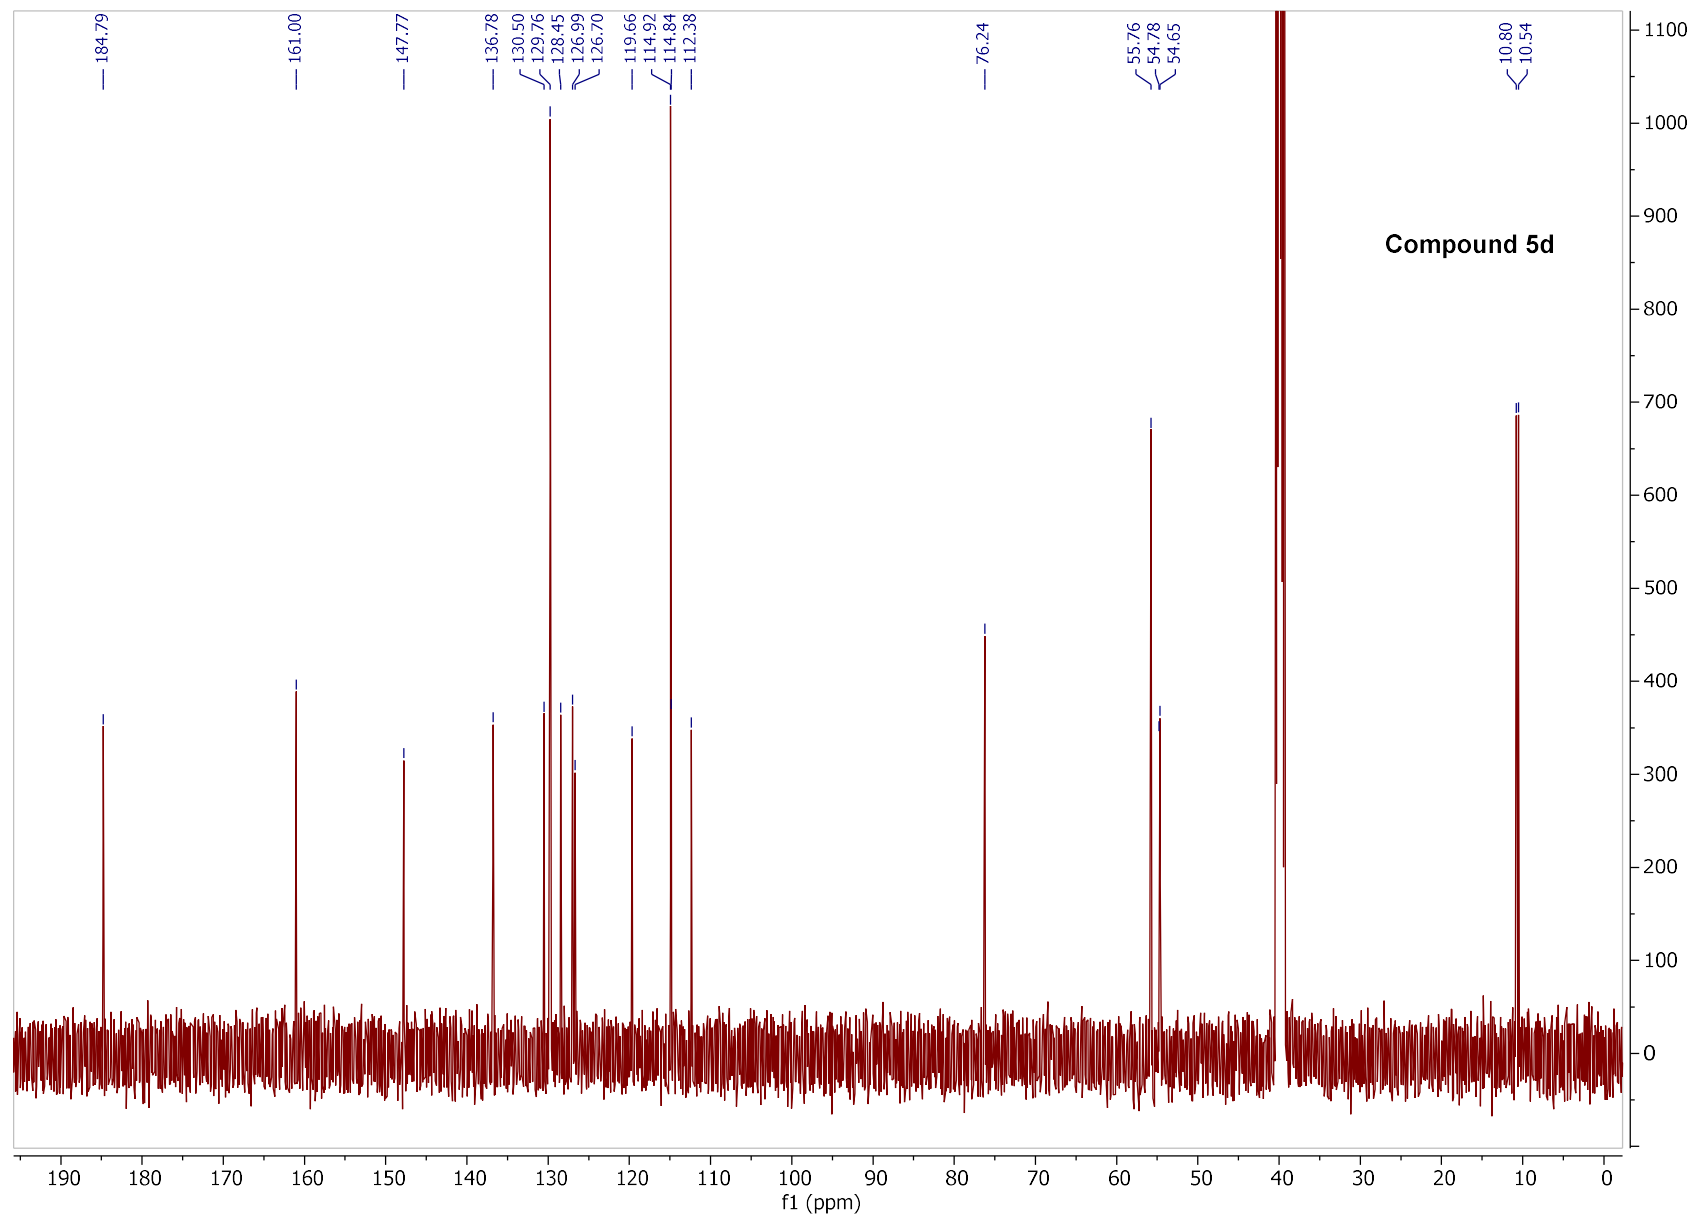

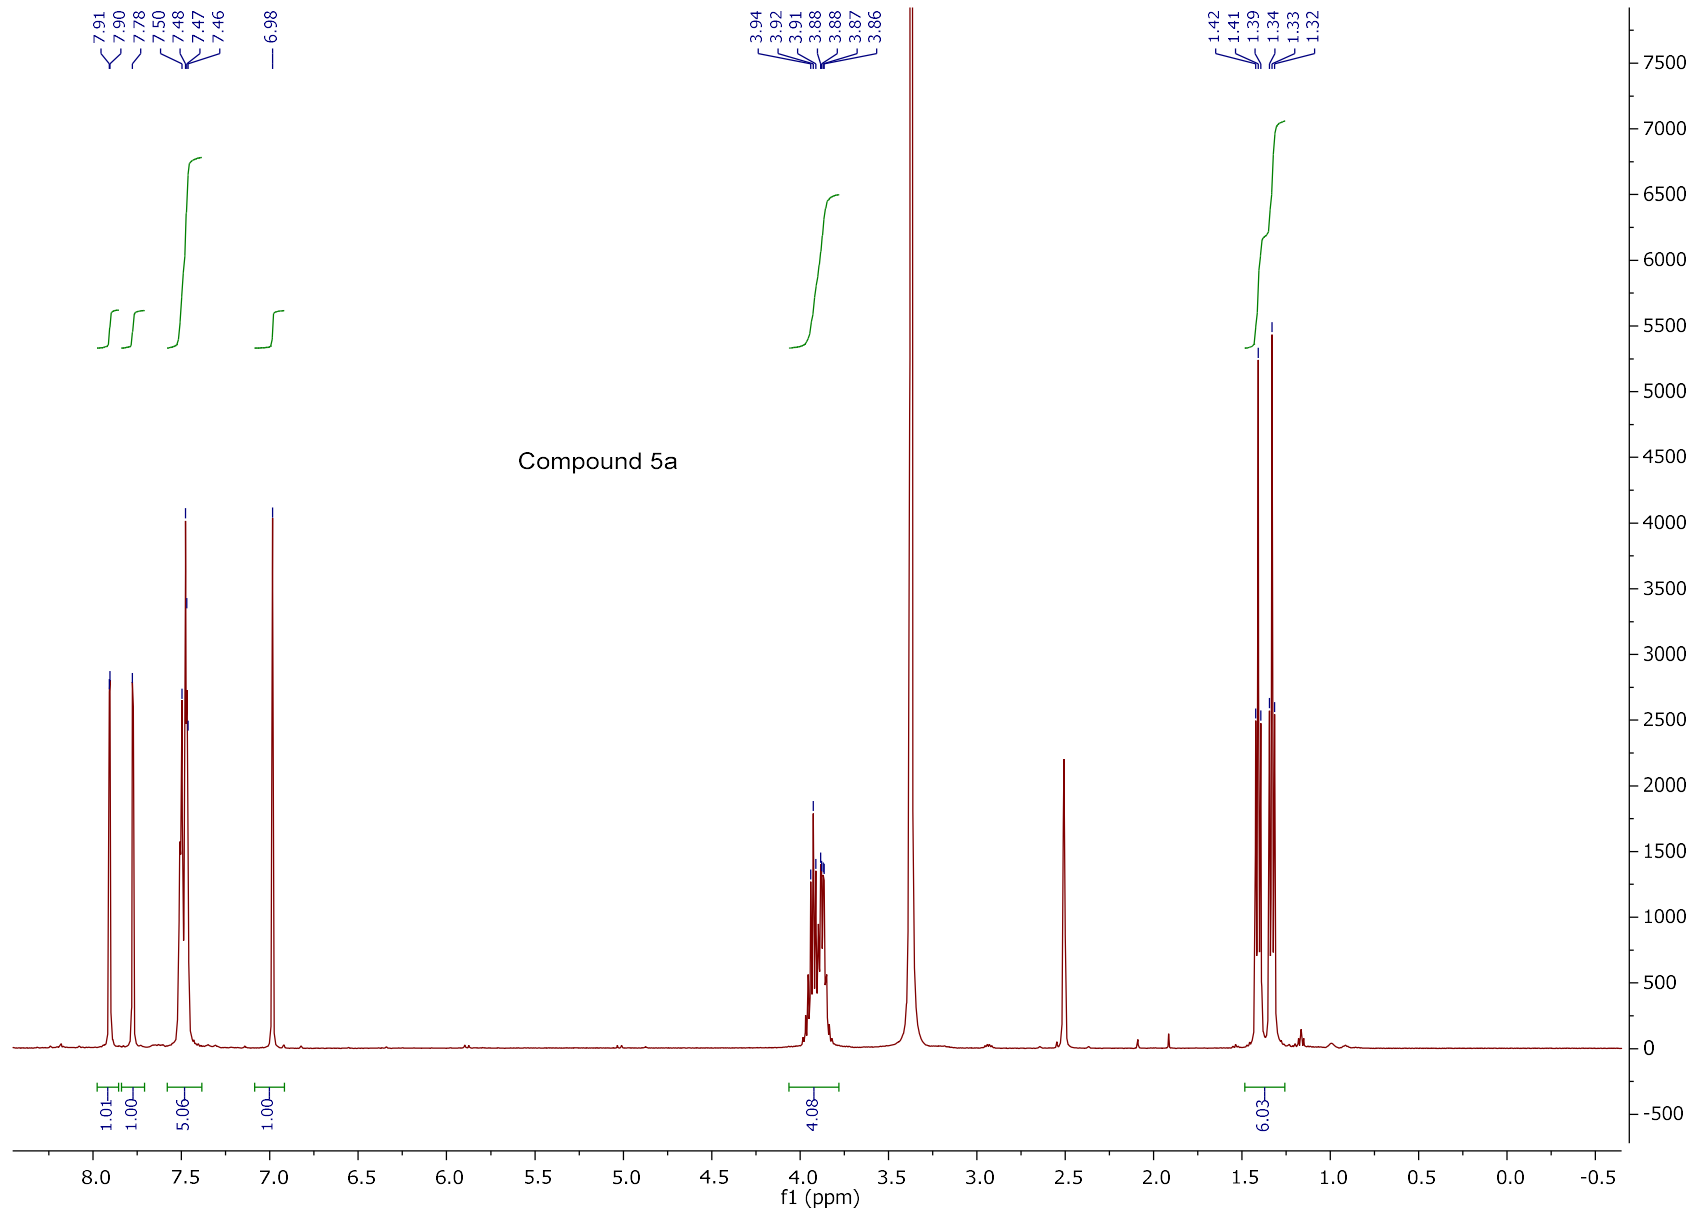

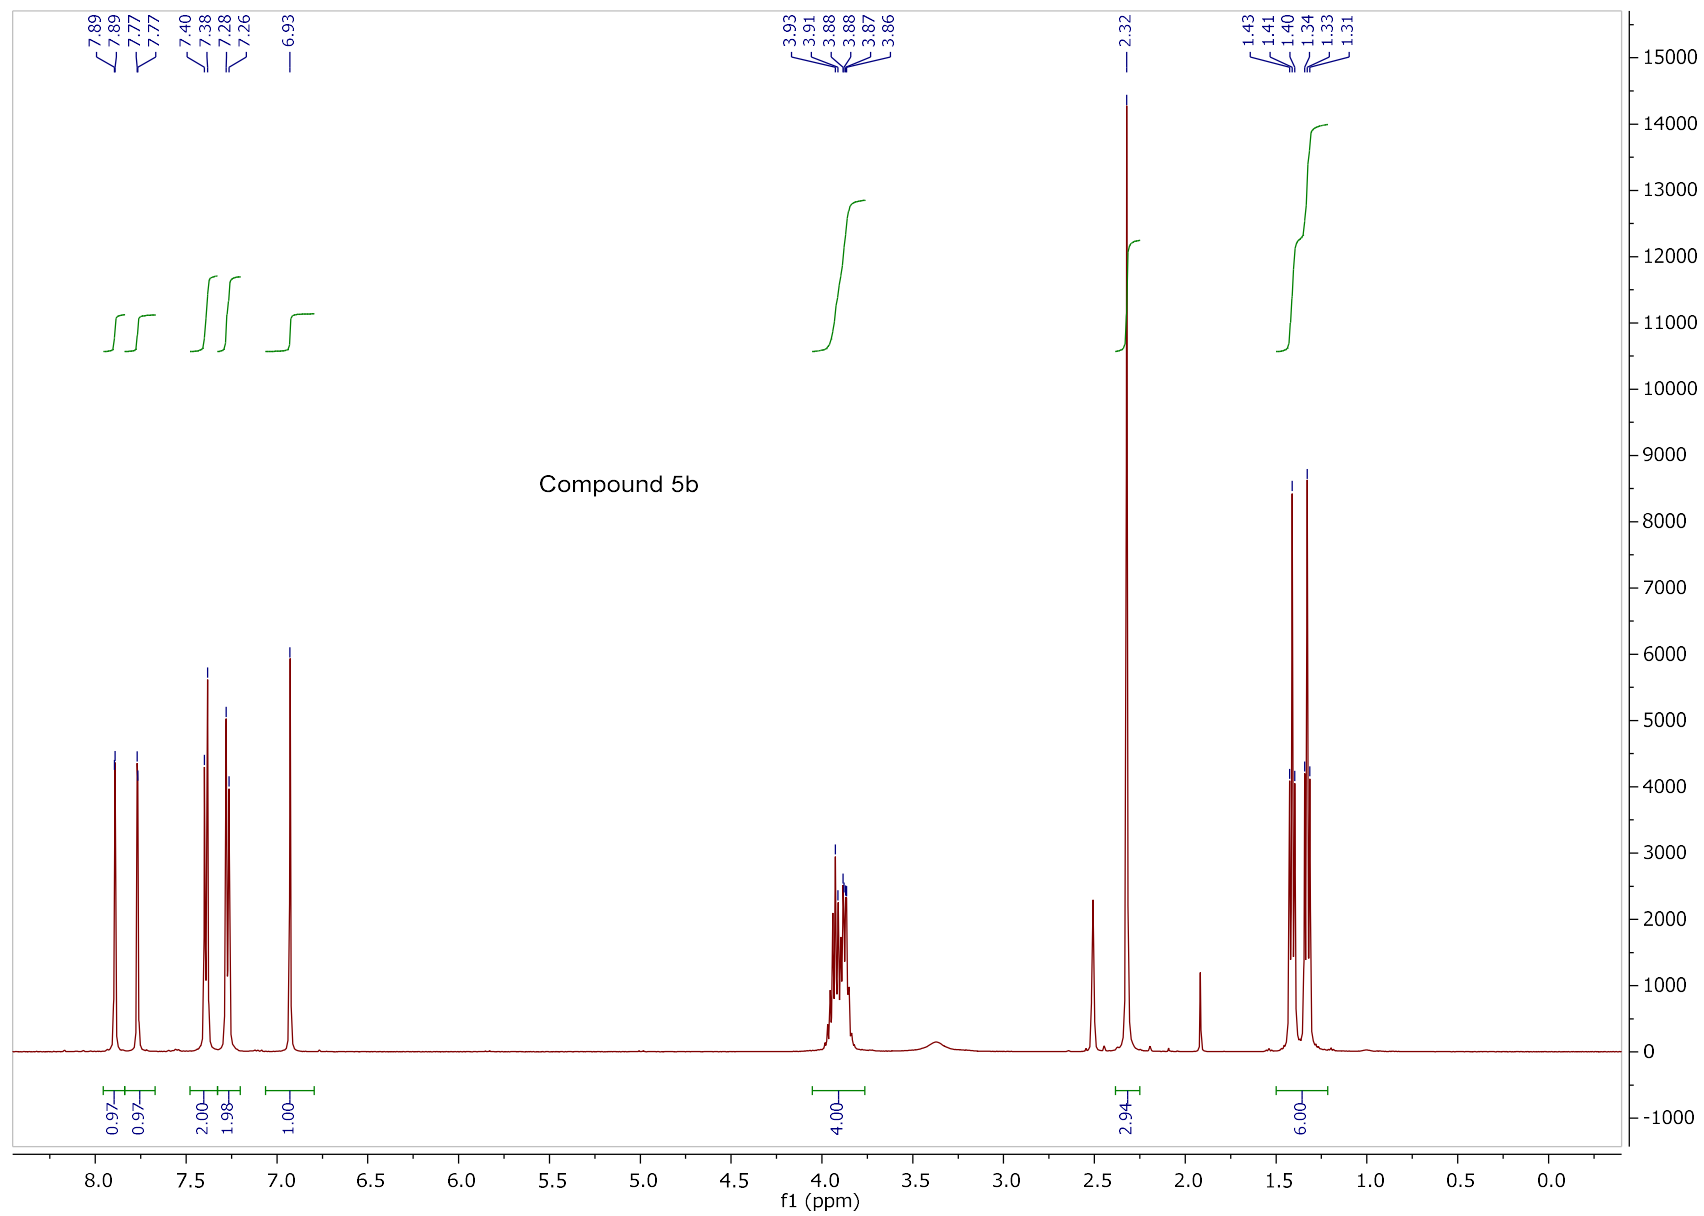

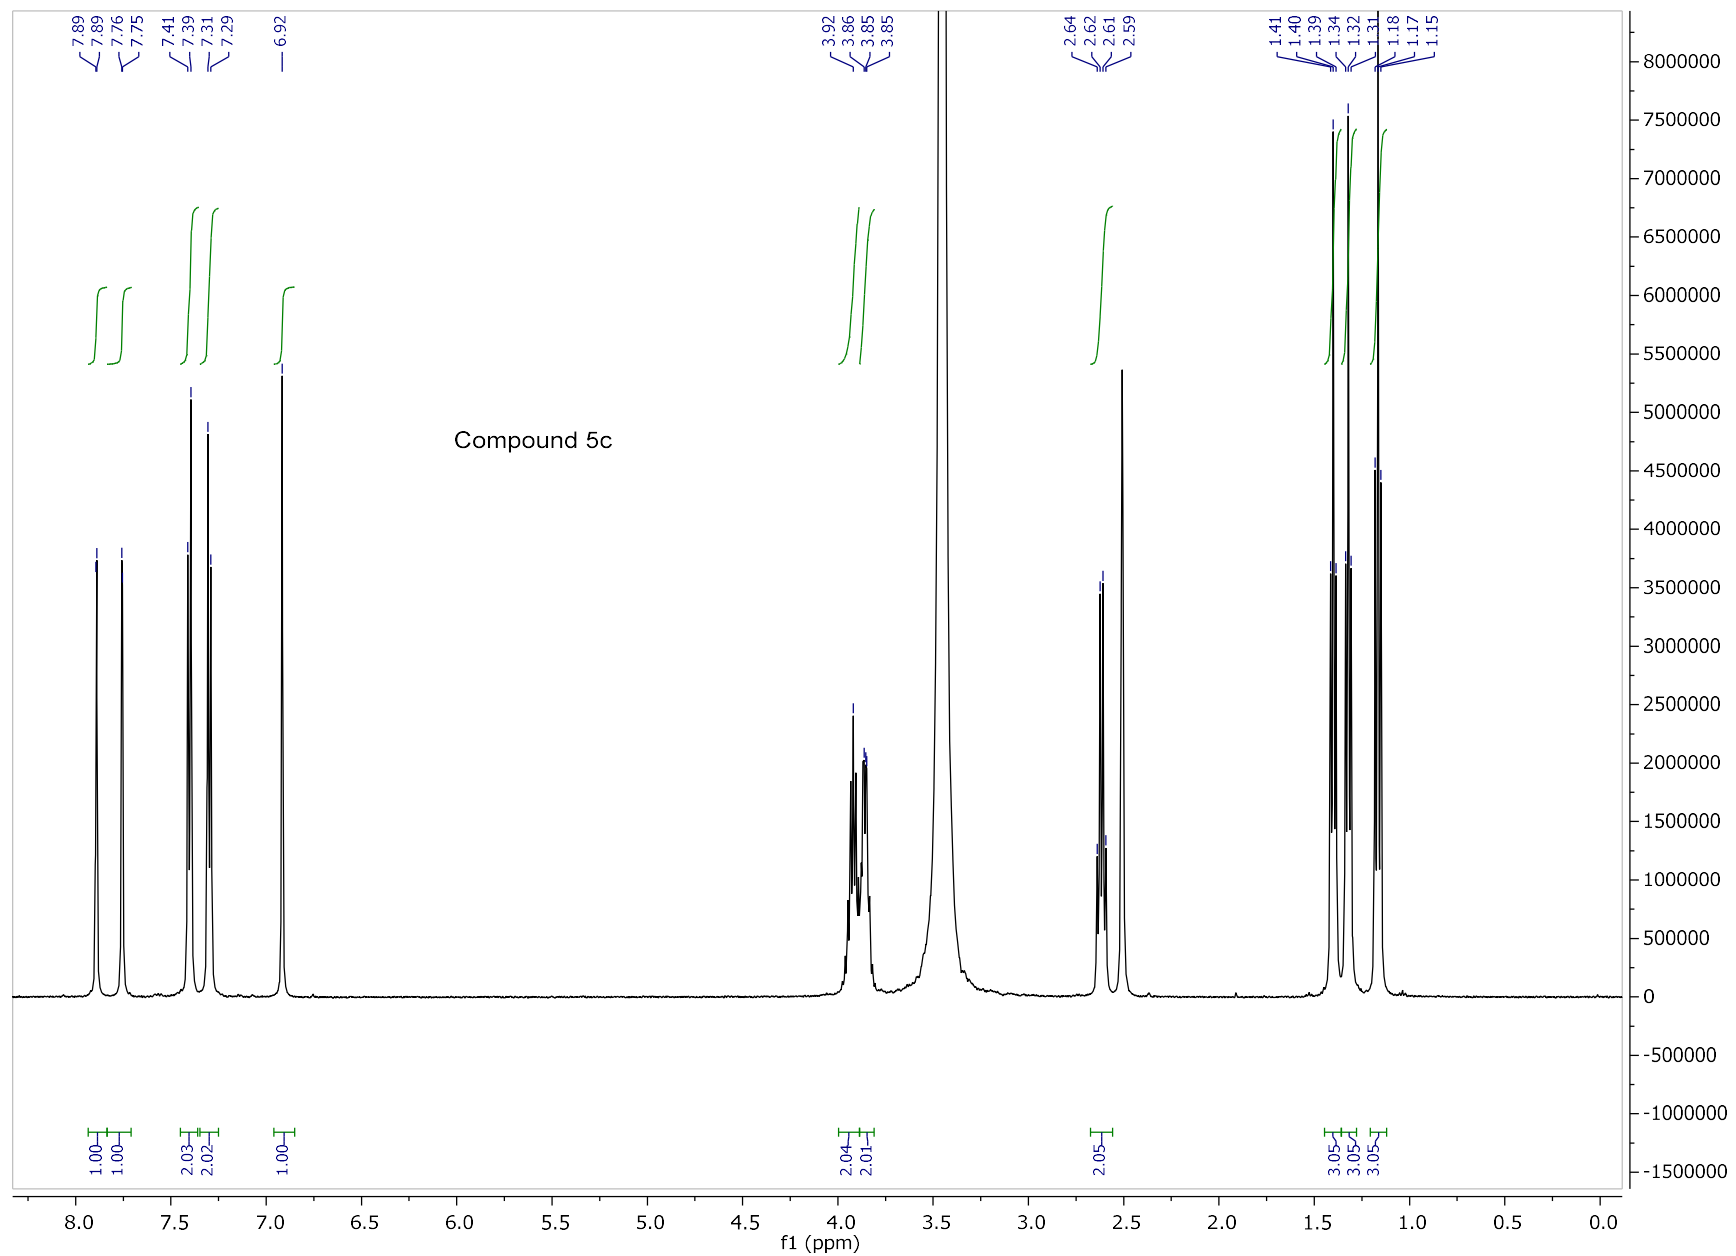

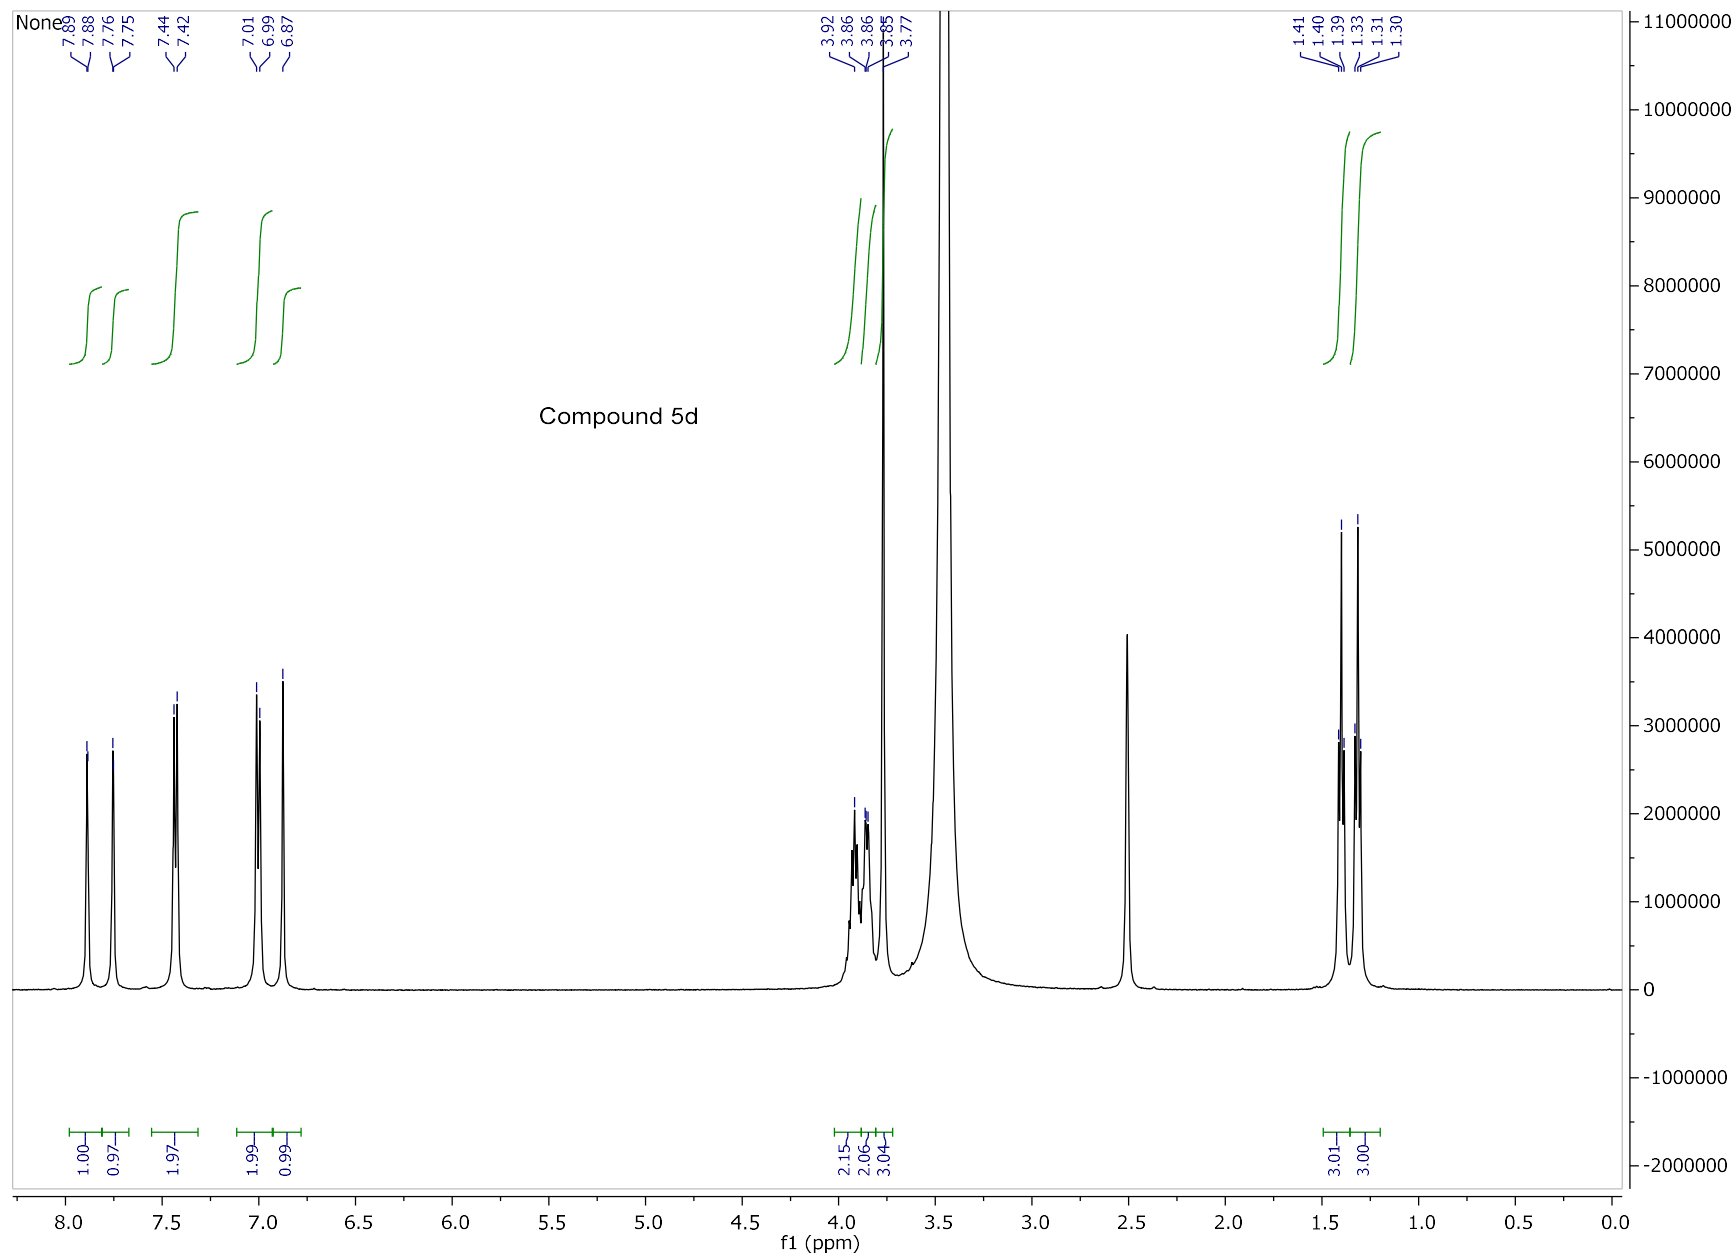

Supplement: s1 [file pharmaceuticals-4099970-supplementary.pdf › pharmaceuticals-4099970-supplementary.pdf]
